# Supplementary material for: Experiences of fathers of children with a life-limiting condition: a systematic review and qualitative synthesis
Source: HighWire-hosted journal article supplement (doi:10.1136/bmjspcare-2021-003019), 2021-06-17
Supplement: bmjspcare-2021-003019supp003_data_supplement.pdf [file bmjspcare-2021-003019supp003_data_supplement.pdf]

## Supplemental Material Quality Appraisal Table for Included Studies

Table a; quality appraisal of included studies using modified CASP tool

| Question                                                                                  | Cancer |             |                   |               |              |              |            |             |              |                  |                |            |                |             |             |             | CHD          |
|-------------------------------------------------------------------------------------------|--------|-------------|-------------------|---------------|--------------|--------------|------------|-------------|--------------|------------------|----------------|------------|----------------|-------------|-------------|-------------|--------------|
|                                                                                           | Study  | Brody, 2007 | Chamberlain, 2007 | Chesler, 2001 | Clarke, 2005 | Cluley, 2015 | Hill, 2009 | Jones, 2003 | Mojica, 2016 | Neil-Urban, 2002 | Nicholas, 2009 | Ogg, 1997  | Robinson, 2019 | Wolff, 2010 | Wolff, 2011 | Wills, 2009 | Bright, 2016 |
|                                                                                           | Rating | Medium      | Medium            | Medium        | Low          | High         | High       | Medium      | Low          | Medium           | High           | Medium     | Medium         | High        | High        | Medium      | Low          |
| 1. Was there a clear statement of the aims of the research?                               |        | Yes         | Yes               | Yes           | Yes          | Yes          | Yes        | Yes         | Yes          | Yes              | Yes            | Yes        | Yes            | Yes         | Yes         | Yes         | Yes          |
| 2. Is the qualitative methodology appropriate?                                            |        | Yes         | Yes               | Yes           | Yes          | Yes          | Yes        | Yes         | Yes          | Yes              | Yes            | Yes        | Yes            | Yes         | Yes         | Yes         | Yes          |
| 3. Was the research design appropriate to address the aims of the research?               |        | Yes         | Yes               | Somewhat      | Yes          | Yes          | Yes        | Yes         | Yes          | Yes              | Yes            | Yes        | Yes            | Yes         | Yes         | Yes         | Yes          |
| 4. Are the studies theoretical underpinnings clear, consistent and conceptually coherent? |        | No          | No                | No            | No           | Yes          | Yes        | No          | Can't tell   | No               | Yes            | Yes        | No             | Some-what   | Some-what   | No          | No           |
| 5. Was the recruitment strategy appropriate to the aims of the research?                  |        | Yes         | Yes               | Yes           | Yes          | Yes          | Yes        | Yes         | Yes          | Yes              | Yes            | Yes        | Yes            | Yes         | Yes         | Yes         | Yes          |
| 6. Was the data collected in a way that addressed the research issue?                     |        | Yes         | Yes               | Somewhat      | Yes          | Yes          | Yes        | Yes         | Yes          | Yes              | Yes            | Yes        | Somewhat       | Yes         | Yes         | Some-what   | Some-what    |
| 7. Has the relationship between researcher and participants been adequately considered?   |        | Can't tell  | Can't tell        | Somewhat      | Can't tell   | Yes          | Yes        | Can't tell  | Can't tell   | Can't tell       | Yes            | Can't tell | Somewhat       | Yes         | Yes         | Can't tell  | No           |
| 8. Have ethical issues been taken into consideration?                                     |        | Yes         | Yes               | Yes           | Can't tell   | Yes          | Yes        | Can't tell  | Yes          | Can't tell       | Yes            | Yes        | Somewhat       | Can't tell  | Can't tell  | Some-what   | Can't tell   |
| 9. Was the data analysis sufficiently rigorous?                                           |        | Yes         | Yes               | Yes           | Somewhat     | Yes          | Yes        | Yes         | Somewhat     | Yes              | Yes            | Yes        | Somewhat       | Yes         | Yes         | Some-what   | Can't tell   |
| 10. Is there a clear statement of findings?                                               |        | Yes         | Yes               | Yes           | Yes          | Yes          | Yes        | Yes         | Yes          | Yes              | Yes            | Yes        | Yes            | Yes         | Yes         | Yes         | Yes          |

| Cancer                            |        |             |                   |               |              |              |            |             |              |                  |                |           |                |             |             |             | CHD          |
|-----------------------------------|--------|-------------|-------------------|---------------|--------------|--------------|------------|-------------|--------------|------------------|----------------|-----------|----------------|-------------|-------------|-------------|--------------|
| Question                          | Study  | Brody, 2007 | Chamberlain, 2007 | Chesler, 2001 | Clarke, 2005 | Cluley, 2015 | Hill, 2009 | Jones, 2003 | Mojica, 2016 | Neil-Urban, 2002 | Nicholas, 2009 | Ogg, 1997 | Robinson, 2019 | Wolff, 2010 | Wolff, 2011 | Wills, 2009 | Bright, 2016 |
|                                   | Rating | Medium      | Medium            | Medium        | Low          | High         | High       | Medium      | Low          | Medium           | High           | Medium    | Medium         | High        | High        | Medium      | Low          |
| 11. How valuable is the research? |        | a, b, c*    | a, b, c*          | a, b, c*      | a, c*        | a, b, c*     | a, b, c*   | a, b, c*    | a, b, c*     | b*               | a, b, c*       | a, b, c*  | a, b, c*       | a, b, c*    | a, b, c*    | a, b, c*    | a, b, c*     |

- \*a. Findings considered in relation to existing research
- b. Discussion relating to implications of findings upon practice or policy
- c. Identification of areas in which further research is necessary

Table b; quality appraisal of included studies using modified CASP tool continued

| Congenital Heart Defect                                                                   |        |             |             |             |                | Cystic Fibrosis |               |                     | Genetic conditions | Life-limiting conditions |              |              |                |             |            | Neurological conditions |             |
|-------------------------------------------------------------------------------------------|--------|-------------|-------------|-------------|----------------|-----------------|---------------|---------------------|--------------------|--------------------------|--------------|--------------|----------------|-------------|------------|-------------------------|-------------|
| Question                                                                                  | Study  | Bruce, 2016 | Clark, 1999 | Gower, 2016 | Robinson, 2019 | Hayes, 2008     | Priddis, 2010 | Shardonnofsky, 2009 | Rivard, 2014       | Bailey-Pearce, 2017      | Davies, 2013 | Davies, 2004 | Nicholas, 2016 | Rigby, 2012 | Ware, 2007 | Applebaum, 2012         | Lucca, 2016 |
|                                                                                           | Rating | High        | Medium      | High        | Low/Medium     | High            | Low           | Medium              | High               | High                     | High         | High         | High           | Medium      | High       | High                    | Low/Medium  |
| 1. Was there a clear statement of the aims of the research?                               | Yes    | Yes         | Yes         | Yes         | Yes            | Yes             | Yes           | Yes                 | Yes                | Yes                      | Yes          | Yes          | Yes            | Yes         | Yes        | Yes                     | Yes         |
| 2. Is the qualitative methodology appropriate?                                            | Yes    | Yes         | Yes         | Yes         | Yes            | Yes             | Yes           | Yes                 | Yes                | Yes                      | Yes          | Yes          | Yes            | Yes         | Yes        | Yes                     | Yes         |
| 3. Was the research design appropriate to address the aims of the research?               | Yes    | Yes         | Yes         | Yes         | Yes            | Yes             | Yes           | Yes                 | Yes                | Yes                      | Yes          | Yes          | Yes            | Yes         | Yes        | Yes                     | Yes         |
| 4. Are the studies theoretical underpinnings clear, consistent and conceptually coherent? | Yes    | No          | Some-what   | Can't tell  | Can't tell     | No              | No            | Yes                 | Yes                | Yes                      | Some-what    | Yes          | Somewhat       | Some-what   | Yes        | Yes                     | No          |
| 5. Was the recruitment strategy appropriate to the aims of the research?                  | Yes    | Yes         | Yes         | Yes         | Yes            | Yes             | Yes           | Yes                 | Yes                | Yes                      | Yes          | Yes          | Yes            | Yes         | Yes        | Yes                     | Yes         |
| 6. Was the data collected in a way that addressed the research issue?                     | Yes    | Yes         | Yes         | Yes         | Somewhat       | Yes             | Yes           | Yes                 | Yes                | Yes                      | Yes          | Yes          | Yes            | Yes         | Yes        | Yes                     | Yes         |
| 7. Has the relationship between researcher and participants been adequately considered?   | Yes    | Can't tell  | Some-what   | Can't tell  | Can't tell     | Can't tell      | Some-what     | Yes                 | Can't tell         | Yes                      | Can't tell   | Some-what    | Somewhat       | Some-what   | Yes        | Yes                     | Can't tell  |
| 8. Have ethical issues been taken into consideration?                                     | Yes    | Can't tell  | Yes         | Can't tell  | Can't tell     | Yes             | Some-what     | Some-what           | Some- what         | Yes                      | Some-what    | Yes          | Yes            | Some-what   | Yes        | Can't tell              | Can't tell  |
| 9. Was the data analysis sufficiently rigorous?                                           | Yes    | Somewhat    | Yes         | Yes         | Yes            | Yes             | Yes           | Some-what           | Yes                | Yes                      | Yes          | Yes          | Yes            | Some-what   | Yes        | Yes                     | Some-what   |
| 10. Is there a clear statement of findings?                                               | Yes    | Yes         | Yes         | Yes         | Yes            | Yes             | Yes           | Yes                 | Yes                | Yes                      | Yes          | Yes          | Yes            | Yes         | Yes        | Yes                     | Yes         |
| 11. How valuable is the research?                                                         | a,b*   | a, b, c*    | a, b, c*    | a, b*       | a, b*          | a, b, c*        | a, b, c*      | a, b*               | a, b, c*           | a, b, c*                 | a, b c*      | a, b, c*     | a, b, c*       | a, b, c*    | a, b, c*   | a, b, c                 | a, b, c*    |

- \*a. Findings considered in relation to existing research
- b. Discussion relating to implications of findings upon practice or policy
- c. Identification of areas in which further research is necessary
